# Supplementary material
Source: PubMed Central journal article supplement (PMC3277315)
Supplement: supp_ddr551_ddr551supp.pdf [file supp_ddr551_ddr551supp.pdf]

## Supplemental Figure 1. Recombination hotspot analysis of a region of chromosome 2p21.

Illustration generated using SequenceLDhot shows the location of recombination hot spots (red peaks) in relation to the location of the new SNPs (red) and GWAS (green) SNPs.

Figure S1

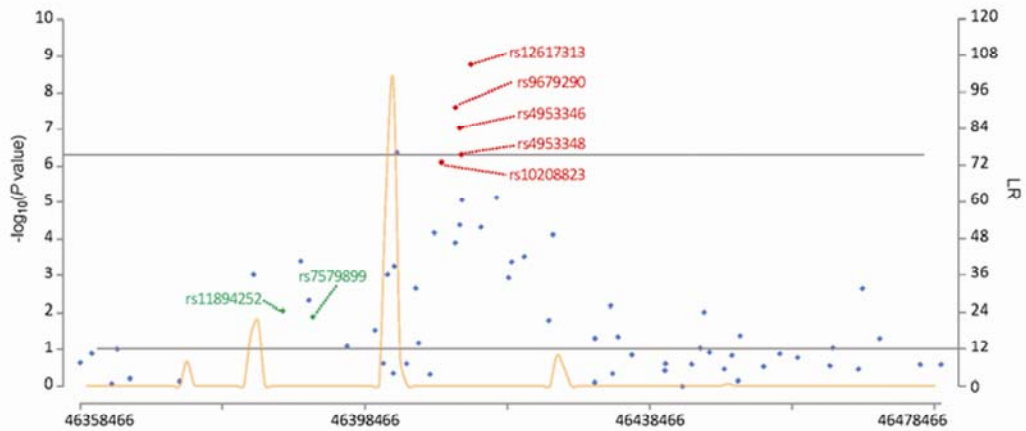

Supplemental Table 1. pairwise r<sup>2</sup> and LD between the old and new SNPs of interest

**D'**

|            | rs11894252 | rs7579899 | rs10208823 | rs9679290 | rs4953348 | rs12617313 |
|------------|------------|-----------|------------|-----------|-----------|------------|
| rs11894252 |            | 1         | 0.47       | 0.42      | 0.36      | 0.44       |
| rs7579899  | 1          |           | 0.47       | 0.42      | 0.36      | 0.44       |
| rs10208823 | 0.09       | 0.09      |            | 1         | 1         | 1          |
| rs9679290  | 0.1        | 0.1       | 0.75       |           | 1         | 0.96       |
| rs4953348  | 0.07       | 0.07      | 0.78       | 0.96      |           | 0.96       |
| rs12617313 | 0.12       | 0.12      | 0.67       | 0.86      | 0.79      |            |

**Supplemental Table 2. Smoking by *EPAS1* SNP interaction**

| Region                  | SNP        | Smoking Status | OR   | 95% CI      | Association P-value | Interaction P-value |
|-------------------------|------------|----------------|------|-------------|---------------------|---------------------|
| <b>Reported in GWAS</b> | rs7579899  | NEVER          | 0.97 | (0.81,1.16) | 7.36E-01            | 0.036               |
|                         |            | FORMER         | 1.34 | (1.10,1.65) | 4.22E-03            |                     |
|                         |            | CURRENT        | 1.25 | (1.05,1.49) | 1.05E-02            |                     |
|                         | rs11894252 | NEVER          | 0.94 | (0.74,1.20) | 6.12E-01            | 0.199               |
|                         |            | FORMER         | 1.26 | (0.99,1.61) | 6.30E-02            |                     |
|                         |            | CURRENT        | 1.26 | (1.01,1.57) | 3.83E-02            |                     |
| <b>NEW</b>              | rs10208823 | NEVER          | 0.75 | (0.64,0.88) | 4.84E-04            | 0.276               |
|                         |            | FORMER         | 0.90 | (0.76,1.07) | 2.28E-01            |                     |
|                         |            | CURRENT        | 0.82 | (0.69,0.98) | 2.81E-02            |                     |
|                         | rs9679290  | NEVER          | 1.38 | (1.20,1.59) | 7.60E-06            | 0.218               |
|                         |            | FORMER         | 1.17 | (1.00,1.38) | 4.83E-02            |                     |
|                         |            | CURRENT        | 1.20 | (1.02,1.40) | 2.62E-02            |                     |
|                         | rs4953346  | NEVER          | 1.36 | (1.16,1.59) | 1.39E-04            | 0.378               |
|                         |            | FORMER         | 1.20 | (1.00,1.43) | 4.49E-02            |                     |
|                         |            | CURRENT        | 1.18 | (1.00,1.40) | 5.51E-02            |                     |
|                         | rs4953348  | NEVER          | 1.33 | (1.14,1.56) | 3.79E-04            | 0.378               |
|                         |            | FORMER         | 1.21 | (1.01,1.44) | 3.74E-02            |                     |
|                         |            | CURRENT        | 1.15 | (0.97,1.36) | 1.16E-01            |                     |
|                         | rs12617313 | NEVER          | 1.42 | (1.21,1.67) | 1.87E-05            | 0.272               |
|                         |            | FORMER         | 1.23 | (1.03,1.48) | 2.51E-02            |                     |
|                         |            | CURRENT        | 1.21 | (1.02,1.43) | 3.10E-02            |                     |

ORs and P-values were calculated adjusting for age, sex, body mass index, study center, family history of cancer (any type of cancer), and hypertension

Supplemental Table 3. EPAS1 variants and risk of having a VHL genetically altered RCC

| EPAS1 Region        |            |                           | RCC Cases     |      |                    |      |                         |           |         |
|---------------------|------------|---------------------------|---------------|------|--------------------|------|-------------------------|-----------|---------|
|                     |            |                           | No Alteration | (%)  | Genetic Alteration | (%)  | Odds Ratio <sup>1</sup> | (95% CI)  | p-value |
| New                 | rs4953346  | GG                        | 24            | 32.4 | 30                 | 18.8 | REF                     |           |         |
|                     |            | GT                        | 32            | 43.2 | 84                 | 52.5 | 2.37                    | 1.16-4.85 | 0.02    |
|                     |            | TT                        | 18            | 24.3 | 46                 | 28.8 | 2.47                    | 1.11-5.47 | 0.03    |
|                     |            | <i>Per allele-p-trend</i> |               |      |                    |      | 1.57                    | 1.04-2.37 | 0.03    |
|                     |            | GT+TT                     | 50            | 67.5 | 130                | 81.3 | 2.41                    | 1.24-4.67 | 0.01    |
|                     | rs12617313 | TT                        | 22            | 31.4 | 28                 | 17.8 | REF                     |           |         |
|                     |            | AT                        | 34            | 48.6 | 79                 | 50.3 | 1.86                    | 0.90-3.87 | 0.10    |
|                     |            | AA                        | 14            | 20.0 | 50                 | 31.9 | 3.32                    | 1.41-7.81 | 0.006   |
|                     |            | <i>Per allele-p-trend</i> |               |      |                    |      | 1.82                    | 1.19-2.80 | 0.006   |
|                     |            | AT+AA                     | 48            | 68.6 | 129                | 82.2 | 2.29                    | 1.15-4.39 | 0.02    |
| Reported<br>in GWAS | 1867786    | GG                        | 27            | 23.7 | 53                 | 19.1 | REF                     | 0.78-2.50 |         |
|                     |            | GA                        | 51            | 44.7 | 135                | 48.7 | 1.40                    | 0.78-2.50 | 0.26    |
|                     |            | AA                        | 36            | 31.6 | 89                 | 32.1 | 1.35                    | 0.73-2.49 | 0.35    |
|                     |            | <i>Per allele-p-trend</i> |               |      |                    |      | 1.14                    | 0.84-1.56 | 0.41    |
|                     |            | GA+AA                     | 87            | 76.3 | 224                | 80.8 | 1.37                    | 0.80-2.36 | 0.25    |
|                     | rs7579899  | GG                        | 17            | 23.9 | 22                 | 14.6 | REF                     |           |         |
|                     |            | AG                        | 29            | 40.9 | 71                 | 47.0 | 1.58                    | 0.70-3.59 | 0.28    |
|                     |            | AA                        | 25            | 35.2 | 58                 | 38.4 | 1.61                    | 0.70-3.74 | 0.27    |
|                     |            | <i>Per allele-p-trend</i> |               |      |                    |      | 1.23                    | 0.81-1.86 | 0.33    |
|                     |            | AG+GG                     | 54            | 76.1 | 129                | 85.4 | 1.60                    | 0.74-3.42 | 0.23    |

Adjusted for age, sex, country, tobacco status, and fruit intake
